# Supplementary material for: SATB1 packages densely looped, transcriptionally active chromatin for coordinated expression of cytokine genes
Source: Springer Nature journal article supplement (doi:10.1038/ng1913), 2006-10-22
Supplement: ng1913-S1.pdf [file ng1913-S1.pdf]

# Supplementary Figure 1

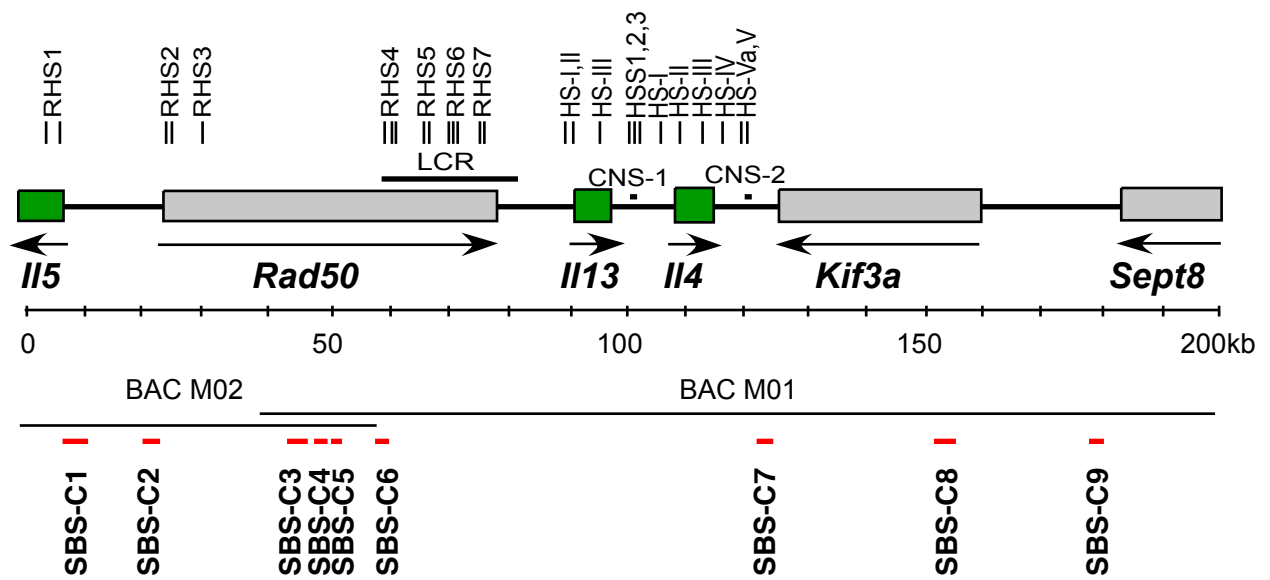

**a**

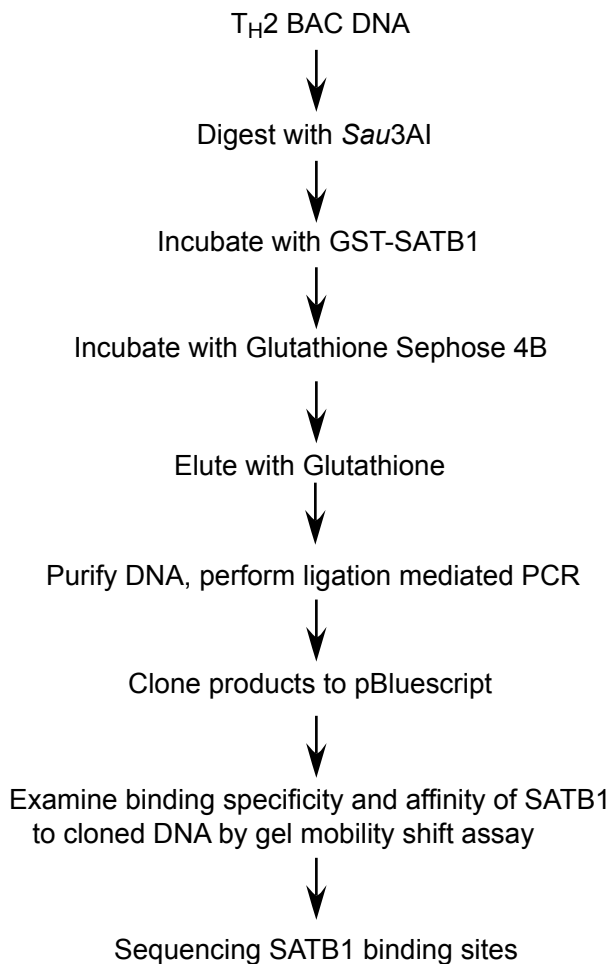

**b**

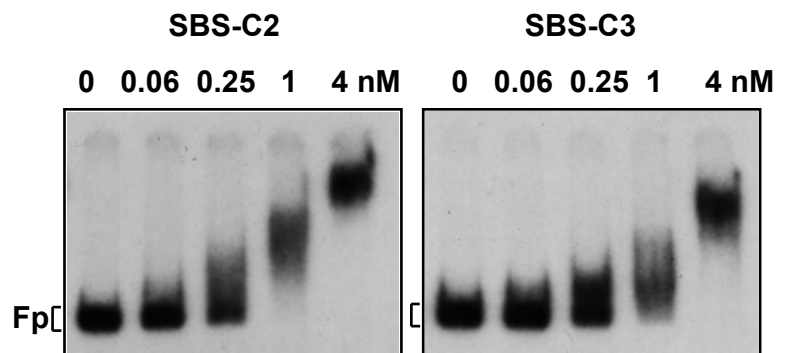

**c**

| SBS | Size (bp) | Kd (nM) | Position*                   |
|-----|-----------|---------|-----------------------------|
| C1  | 2210      | 0.25    | chr11:53,559,750-53,561,957 |
| C2  | 1842      | 0.25    | chr11:53,547,379-53,549,220 |
| C3  | 1696      | 0.25    | chr11:53,525,340-53,527,035 |
| C4  | 968       | 0.25-1  | chr11:53,522,065-53,523,032 |
| C5  | 1133      | 0.25-1  | chr11:53,519,697-53,520,829 |
| C6  | 908       | 0.25-1  | chr11:53,511,507-53,512,414 |
| C7  | 859       | 2-4     | chr11:53,445,830-53,446,688 |
| C8  | 1552      | 0.25-1  | chr11:53,416,073-53,417,624 |
| C9  | 815       | 0.25    | chr11:53,390,647-53,391,461 |

\*UCSC Genome Browser on Mouse Feb 2006 Assembly

**Supplementary Fig. 1 Cloning of genomic sequences which bind to SATB1 *in vitro*.**

**a,** We used two overlapping BAC clones (MO1 and MO2) derived from the 200-kb T<sub>H</sub>2 cytokine locus and followed the scheme illustrated to obtain a series of pBluescript plasmid DNA containing SATB1-binding sequences (see Methods). After sequencing, the cloned fragments were digested, end-labeled with {<sup>32</sup>P}dATP and Klenow polymerase. Gel mobility shift assay was performed using Glutathione *S*-transferase (GST)-fused SATB1 (amino acid 346-763) (Dickinson, L.A., Dickinson, C.D., Kohwi-Shigematsu, T., *J. Biol. Chem.* **272**:11463-11470, 1997). **b,** Representative gel-mobility data are shown for SBS-C2 and SBS-C3. Under conditions of protein excess, the dissociation constant (K<sub>d</sub>) was estimated at the concentration of protein that results in a 50% shift. **c,** Size of fragment, K<sub>d</sub>, and genomic positions are shown.
